# Supplementary material for: BNT162b2 Booster Vaccination Induced Immunity against SARS-CoV-2 Variants among Hemodialysis Patients
Source: MDPI journal article supplement (doi:10.3390/vaccines10060967), 2022-06-17
Supplement: s1 [file s1]

Table S1. Demographic data on the dialysis group in this study.

|                               | Whole Dialysis group | Dialysis subgroup for<br>neutralizing antibodies and FACS |    |
|-------------------------------|----------------------|-----------------------------------------------------------|----|
| Age(years)                    | 71.8±12.2            | 71±12.8                                                   | NS |
| Gender(male%)                 | 70%                  | 65%                                                       | NS |
| Weight(Kg)                    | 73.5±18              | 74±12                                                     | NS |
| Weight(cm)                    | 166±25               | 167±8                                                     | NS |
| BMI(Kg/m <sup>2</sup> )       | 27.1±5.2             | 27.6±5.3                                                  | NS |
| T2DM(%)                       | 58%                  | 52%                                                       | NS |
| IHD(%)                        | 50%                  | 47%                                                       | NS |
| Malignancy(%)                 | 22%                  | 23.50%                                                    | NS |
| S/P transplant(%)             | 10%                  | 8%                                                        | NS |
| Dialysis Efficiency (Kt/V)    | 1.4±0.3              | 1.5±0.3                                                   | NS |
| Protein catabolic rate (nPCR) | 1.1±0.3              | 1.1±0.2                                                   | NS |
| Hb (g/L)                      | 10.7±1.1             | 10.6±1                                                    | NS |
| Albumin(g/dL)                 | 4±0.3                | 4±0.2                                                     | NS |
| Globulin(g/dL)                | 2.7±0.4              | 2.8±0.4                                                   | NS |
